# Supplementary material for: Genetic Architecture of Suicidal Ideation Continuum: Latent Profile Analysis of Data using the Million Veteran Program Cohort
Source: Research Square preprint supplement (doi:10.21203/rs.3.rs-6066944/v1), 2025-05-21
Supplement: Supplementary file 1 [file 3bc887cb9e16ed9c73257d76.xlsx]

## Sheet: Sheet1
Table S5. Summary statistics of pairwise comparisons of disease comorbidity measured by CCI across SI subtypes.
	estimate	SE	Z	p
M-SI/ND Vs. No-SI	0.41	0.04	10.5	<0.0001
M-SI/WD Vs. No-SI	0.4	0.04	10	<0.0001
V-SI Vs. No-SI	0.59	0.04	15.23	<0.0001
P-SI Vs. No-SI	0.4	0.03	13.18	<0.0001
M-SI/WD Vs. M-SI/ND	-0.01	0.05	-0.15	0.9999
V-SI Vs/ M-SI/ND	0.18	0.05	3.51	0.0041
P-SI Vs. M-SI/ND	-0.01	0.05	-0.25	0.9991
V-SI Vs. M-SI/WD	0.19	0.05	3.62	0.0027
P-SI Vs. M-SI/WD	0	0.05	-0.08	1
P-SI Vs. V-SI	-0.19	0.05	-4.27	0.0002
