# Supplementary material for: Genetic Architecture of Suicidal Ideation Continuum: Latent Profile Analysis of Data using the Million Veteran Program Cohort
Source: Research Square preprint supplement (doi:10.21203/rs.3.rs-6066944/v1), 2025-05-21
Supplement: Supplementary file 2 [file 3e9d02823da4aa39cafb1a90.xlsx]

## Sheet: Sheet1
Table S6. Summary statistics of pairwise comparisons of proportion of death by suicide across SI subtypes using logistic regression model.
	OR	SE	Z	p
M-SI/ND Vs. No-SI	2.49	0.54	4.17	0.0003
M-SI/WD Vs. No-SI	1.55	0.41	1.66	0.4576
V-SI Vs. No-SI	1.83	0.44	2.52	0.0864
P-SI Vs. No-SI	2.46	0.43	5.16	<0.0001
M-SI/WD Vs. M-SI/ND	0.62	0.19	-1.56	0.5222
V-SI Vs/ M-SI/ND	0.74	0.21	-1.07	0.8236
P-SI Vs. M-SI/ND	0.99	0.23	-0.05	1
V-SI Vs. M-SI/WD	1.19	0.38	0.53	0.984
P-SI Vs. M-SI/WD	1.59	0.43	1.71	0.4301
P-SI Vs. V-SI	1.24	0.34	1.16	0.773
