# Supplementary material for: Genetic Architecture of Suicidal Ideation Continuum: Latent Profile Analysis of Data using the Million Veteran Program Cohort
Source: Research Square preprint supplement (doi:10.21203/rs.3.rs-6066944/v1), 2025-05-21
Supplement: Supplementary file 3 [file 60ea5438528210f724a571ab.xlsx]

## Sheet: Sheet1
Table S1. ICD 9/10 codes used to identify comorbid conditions of SI cohort from EHR.
Disorder	ICD	Version
SCZ	295	9
SCZ	295	9
SCZ	295.01	9
SCZ	295.02	9
SCZ	295.03	9
SCZ	295.04	9
SCZ	295.05	9
SCZ	295.1	9
SCZ	295.1	9
SCZ	295.11	9
SCZ	295.12	9
SCZ	295.13	9
SCZ	295.14	9
SCZ	295.15	9
SCZ	295.2	9
SCZ	295.2	9
SCZ	295.21	9
SCZ	295.22	9
SCZ	295.23	9
SCZ	295.24	9
SCZ	295.25	9
SCZ	295.3	9
SCZ	295.3	9
SCZ	295.31	9
SCZ	295.32	9
SCZ	295.33	9
SCZ	295.34	9
SCZ	295.35	9
SCZ	295.4	9
SCZ	295.41	9
SCZ	295.42	9
SCZ	295.43	9
SCZ	295.44	9
SCZ	295.45	9
SCZ	295.5	9
SCZ	295.5	9
SCZ	295.51	9
SCZ	295.52	9
SCZ	295.53	9
SCZ	295.54	9
SCZ	295.55	9
SCZ	295.6	9
SCZ	295.6	9
SCZ	295.61	9
SCZ	295.62	9
SCZ	295.63	9
SCZ	295.64	9
SCZ	295.65	9
SCZ	295.7	9
SCZ	295.7	9
SCZ	295.71	9
SCZ	295.72	9
SCZ	295.73	9
SCZ	295.74	9
SCZ	295.75	9
SCZ	295.8	9
SCZ	295.8	9
SCZ	295.81	9
SCZ	295.82	9
SCZ	295.83	9
SCZ	295.84	9
SCZ	295.85	9
SCZ	295.9	9
SCZ	295.9	9
SCZ	295.91	9
SCZ	295.92	9
SCZ	295.93	9
SCZ	295.94	9
SCZ	295.95	9
SCZ	V11.0	9
SCZ	F20	10
SCZ	F20.0	10
SCZ	F20.1	10
SCZ	F20.2	10
SCZ	F20.3	10
SCZ	F20.5	10
SCZ	F20.6	10
SCZ	F20.8	10
SCZ	F20.81	10
SCZ	F20.89	10
SCZ	F20.9	10
SCZ	F25	10
SCZ	F25.0	10
SCZ	F25.1	10
SCZ	F25.2	10
SCZ	F25.8	10
SCZ	F25.9	10
SCZ	295	9
SCZ	295.4	9
Psychosis	293.81	9
Psychosis	293.82	9
Psychosis	298	9
Psychosis	298	9
Psychosis	298.1	9
Psychosis	298.8	9
Psychosis	298.9	9
Psychosis	298.9	9
Psychosis	F06.0	10
Psychosis	F06.2	10
Psychosis	F23.2	10
Psychosis	F28	10
Psychosis	F29	10
Paranoid disorders	297	9
Paranoid disorders	297	9
Paranoid disorders	297.1	9
Paranoid disorders	297.2	9
Paranoid disorders	297.3	9
Paranoid disorders	297.8	9
Paranoid disorders	297.9	9
Paranoid disorders	298.3	9
Paranoid disorders	298.4	9
Paranoid disorders	F22	10
Paranoid disorders	F22.0	10
Paranoid disorders	F22.8	10
Paranoid disorders	F22.9	10
Paranoid disorders	F23	10
Paranoid disorders	F23.3	10
Paranoid disorders	F24	10
BIP	296	9
BIP	296	9
BIP	296.01	9
BIP	296.02	9
BIP	296.03	9
BIP	296.04	9
BIP	296.05	9
BIP	296.06	9
BIP	296.1	9
BIP	296.1	9
BIP	296.11	9
BIP	296.12	9
BIP	296.13	9
BIP	296.14	9
BIP	296.15	9
BIP	296.16	9
BIP	296.4	9
BIP	296.4	9
BIP	296.41	9
BIP	296.42	9
BIP	296.43	9
BIP	296.44	9
BIP	296.45	9
BIP	296.46	9
BIP	296.5	9
BIP	296.5	9
BIP	296.51	9
BIP	296.52	9
BIP	296.53	9
BIP	296.54	9
BIP	296.55	9
BIP	296.56	9
BIP	296.6	9
BIP	296.6	9
BIP	296.61	9
BIP	296.62	9
BIP	296.63	9
BIP	296.64	9
BIP	296.65	9
BIP	296.66	9
BIP	296.7	9
BIP	296.7	9
BIP	296.8	9
BIP	296.8	9
BIP	296.81	9
BIP	296.82	9
BIP	296.89	9
BIP	F30.1	10
BIP	F30.10	10
BIP	F30.11	10
BIP	F30.12	10
BIP	F30.13	10
BIP	F30.2	10
BIP	F30.3	10
BIP	F30.4	10
BIP	F30.8	10
BIP	F30.9	10
BIP	F31	10
BIP	F31	10
BIP	F31.0	10
BIP	F31.1	10
BIP	F31.10	10
BIP	F31.11	10
BIP	F31.12	10
BIP	F31.13	10
BIP	F31.2	10
BIP	F31.3	10
BIP	F31.30	10
BIP	F31.31	10
BIP	F31.32	10
BIP	F31.4	10
BIP	F31.5	10
BIP	F31.6	10
BIP	F31.60	10
BIP	F31.61	10
BIP	F31.62	10
BIP	F31.63	10
BIP	F31.64	10
BIP	F31.7	10
BIP	F31.70	10
BIP	F31.71	10
BIP	F31.72	10
BIP	F31.73	10
BIP	F31.74	10
BIP	F31.75	10
BIP	F31.76	10
BIP	F31.77	10
BIP	F31.78	10
BIP	F31.8	10
BIP	F31.81	10
BIP	F31.89	10
BIP	F31.9	10
BIP	F32.81	10
MDD	296.2	9
MDD	296.2	9
MDD	296.22	9
MDD	296.23	9
MDD	296.24	9
MDD	296.25	9
MDD	296.26	9
MDD	296.3	9
MDD	296.3	9
MDD	296.32	9
MDD	296.33	9
MDD	296.34	9
MDD	296.35	9
MDD	296.36	9
MDD	F20.4	10
MDD	F32	10
MDD	F32.0	10
MDD	F32.1	10
MDD	F32.2	10
MDD	F32.3	10
MDD	F32.4	10
MDD	F32.5	10
MDD	F32.8	10
MDD	F32.81	10
MDD	F32.89	10
MDD	F32.9	10
MDD	F33	10
MDD	F33.0	10
MDD	F33.1	10
MDD	F33.2	10
MDD	F33.3	10
MDD	F33.4	10
MDD	F33.40	10
MDD	F33.41	10
MDD	F33.42	10
MDD	F33.8	10
MDD	F33.9	10
MDD	296.21	9
MDD	296.31	9
MDD	311	9
TBI	S06.	10
TBI	850	9
PTSD	309.81	9
PTSD	F43.0	10
PTSD	F43.10	10
PTSD	F43.11	10
PTSD	F43.12	10
PTSD	V11.4	9
PTSD	Z86.51	10
