# Supplementary material for: Genetic Architecture of Suicidal Ideation Continuum: Latent Profile Analysis of Data using the Million Veteran Program Cohort
Source: Research Square preprint supplement (doi:10.21203/rs.3.rs-6066944/v1), 2025-05-21
Supplement: Supplementary file 4 [file 850c5f97d23e2bccbb321e90.xlsx]

## Sheet: Sheet1
Table S2. Reproducibility of ideation subtypes measured by in-group proportion (IGP) and proportion of participant in each cluster.
	IGP		Proportion of participant
	Training set	Test set	Training set	Test set
M-SI/ND	0.998	0.997	0.21	0.23
M-SI/WD	0.997	0.994	0.2	0.23
V-SI	0.995	0.993	0.2	0.21
P-SI	0.999	0.998	0.39	0.33
