# Supplementary material for: Genetic Architecture of Suicidal Ideation Continuum: Latent Profile Analysis of Data using the Million Veteran Program Cohort
Source: Research Square preprint supplement (doi:10.21203/rs.3.rs-6066944/v1), 2025-05-21
Supplement: Supplementary file 6 [file a676cae69b66db343335085f.docx]

**Supplementary Tables**

**Table S1.** ICD 9/10 codes used to identify comorbid conditions of SI cohort from EHR.

**Table S2.** Reproducibility of ideation subtypes measured by in-group proportion (IGP) and proportion of participants in each cluster.

**Table S3.** Summary statistics of the five PHQ-9 aggregates used in clustering analysis by SI subtypes.

**Table S4.** Summary statistics of pairwise comparisons of individual disease comorbidities across SI subtypes.

**Table S5.** Summary statistics of pairwise comparisons of disease comorbidity measured by CCI across SI subtypes.

**Table S6.** Summary statistics of pairwise comparisons of proportion of death by suicide across SI subtypes using logistic regression model.

**Table S7.** Test results from the multinormal logistic regression comparing the three-level variable describing cause of death and death status by suicide across SI subtypes.

|  | Total | No-SI | M-SI/ND | M-SI/WD | V-SI | P-SI | P-value |
| --- | --- | --- | --- | --- | --- | --- | --- |
| N | 75,393 | 45,685 | 6,126 | 5,835 | 6,304 | 13,301 |  |
| Baseline Age (Year) | 58.54 ± 13.90 | 61.02 ± 13.78 | 58.11 ±  12.98 | 52.54 ± 13.27 | 55.22 ± 12.99 | 53.73 ± 13.03 | <.0001 |
| Sex: Female | 9,508  (13%) | 5,212  (11%) | 705  (12%) | 1,112 (19%) | 935  (15%) | 1,544 (13%) | <.0001 |
| HARE | | | | | | | |
| EUR | 49,522 (66%) | 32,166 (70%) | 3,829  (63%) | 3,385 (58%) | 3,636  (58%) | 6,506 (57%) | <.0001 |
| AFR | 16,910 (22%) | 9,049  (20%) | 1,593  (26%) | 1,587 (27%) | 1,764  (28%) | 2,887 (25%) |
| ASN | 730  (1%) | 331  (1%) | 57  (1%) | 87  (1%) | 57  (1%) | 198  (2%) |
| HIS | 7,006  (9%) | 3,549  (8%) | 542  (9%) | 667  (11%) | 681  (11%) | 1,567 (14%) |
| NA | 1,225  (2%) | 590  (1%) | 105  (2%) | 109  (2%) | 136  (2%) | 285  (2%) |
| EHR Suicide Diagnosis | | | | | | | |
| Attempt/intentional self-harm (SA/SH) | 3,341  (4%) | 0  (0%) | 446  (7%) | 404  (7%) | 805  (13%) | 1,686 (15%) |  |
| Ideation (SI) | 5,723  (8%) | 0  (0%) | 848  (14%) | 834  (14%) | 1,334  (21%) | 27,07 (24%) |
| No Indication  (No SI/SA) | 66,329 (88%) | 45,685 (100%) | 4,832  (79%) | 4,597 (79%) | 4,165  (66%) | 7,050 (62%) |

**Table S8**. Demographic information of MVP participants in ideation subtypes GWAS. Note, participants without baseline age for No-SI and those with SA/SH or SI from EHR were excluded herein and in all GWAS analyses.
