# Supplementary material for: Genetic Architecture of Suicidal Ideation Continuum: Latent Profile Analysis of Data using the Million Veteran Program Cohort
Source: Research Square preprint supplement (doi:10.21203/rs.3.rs-6066944/v1), 2025-05-21
Supplement: Supplementary file 7 [file d137ff9b0d40e699805cf1f2.xlsx]

## Sheet: Sheet1
V-SI Vs/ M-SI/ND				P-SI Vs. M-SI/ND				V-SI Vs. M-SI/WD				P-SI Vs. M-SI/WD				P-SI Vs. V-SI
p	OR	LCI	RCL	p	OR	LCI	RCL	p	OR	LCI	RCL	p	OR	LCI	RCL	p	OR	LCI	RCL
<.0001	2.02	1.86	2.19	<.0001	2.75	2.56	2.96	0.0418	0.87	0.8	0.96	0.0006	1.19	1.09	1.3	<.0001	1.37	1.26	1.48
<.0001	1.75	1.63	1.87	<.0001	2.57	2.42	2.74	<.0001	0.77	0.72	0.83	0.0027	1.13	1.06	1.21	<.0001	1.47	1.38	1.57
<.0001	1.61	1.48	1.75	<.0001	1.55	1.44	1.68	<.0001	1.32	1.21	1.43	<.0001	1.27	1.18	1.37	1	0.97	0.9	1.03
<.0001	1.34	1.19	1.51	0.0011	1.24	1.11	1.38	<.0001	1.86	1.63	2.13	<.0001	1.72	1.52	1.94	1	0.92	0.83	1.02
<.0001	1.36	1.2	1.55	<.0001	1.33	1.19	1.5	<.0001	1.72	1.5	1.98	<.0001	1.68	1.48	1.91	1	0.98	0.88	1.08
1	1.24	0.93	1.64	1	1.06	0.82	1.37	0.8167	1.31	0.98	1.74	1	1.12	0.86	1.46	1	0.86	0.68	1.09
<.0001	1.72	1.45	2.03	<.0001	1.89	1.63	2.2	1	0.92	0.8	1.06	1	1.02	0.9	1.15	1	1.1	0.97	1.25
