# Supplementary material for: Genetic Architecture of Suicidal Ideation Continuum: Latent Profile Analysis of Data using the Million Veteran Program Cohort
Source: Research Square preprint supplement (doi:10.21203/rs.3.rs-6066944/v1), 2025-05-21
Supplement: Supplementary file 8 [file d598a50ad8f2f5c6f77d970a.xlsx]

## Sheet: Sheet1
Table S7. Test results from the multinormal logistic regression comparing the three-level variable describing cause of death and death status by suicide across SI subtypes.
Cause of death (reference: alive)	Term (reference: No-SI)	OR	estimate	se	LCI	RCI	statistic	p
Other	Intercept	0.002	-6.18	0.059	-6.30	-6.07	-104.87	<0.0001
Other	Age	1.085	0.08	0.001	0.080	0.083	93.91	<0.0001
Other	Gender:F	0.495	-0.7	0.038	-0.78	-0.63	-18.48	<0.0001
Other	M-SI/ND	1.05	0.05	0.032	-0.01	0.11	1.54	0.1243
Other	M-SI/WD	0.98	-0.02	0.037	-0.10	0.05	-0.65	0.5177
Other	V-SI	1.22	0.2	0.033	0.14	0.27	6.14	<0.0001
Other	P-SI	1.01	0.01	0.027	-0.04	0.06	0.34	0.733
Suicide	Intercept	0.004	-5.52	0.316	-6.14	-4.90	-17.50	<0.0001
Suicide	Age	0.99	-0.01	0.005	-0.02	0.0006	-1.84	0.0663
Suicide	Gender:F	0.325	-1.13	0.29	-1.69	-0.56	-3.88	0.0001
Suicide	M-SI/ND	2.47	0.9	0.218	0.48	1.33	4.14	<0.0001
Suicide	M-SI/WD	1.52	0.42	0.262	-0.10	0.93	1.59	0.1124
Suicide	V-SI	1.86	0.62	0.24	0.15	1.09	2.57	0.001
Suicide	P-SI	2.41	0.88	0.174	0.54	1.22	5.06	<0.0001
