# Supplementary material for: Genetic Architecture of Suicidal Ideation Continuum: Latent Profile Analysis of Data using the Million Veteran Program Cohort
Source: Research Square preprint supplement (doi:10.21203/rs.3.rs-6066944/v1), 2025-05-21
Supplement: Supplementary file 9 [file fb7a938974906d80d32606d9.xlsx]

## Sheet: Sheet1
Table S3. Summary statistics of the five PHQ-9 aggregates used in clustering analysis by SI subtypes.
subtype	stat	mean	sd	median	iqr	max	min	q1	q3
M-SI/ND	i9_max	1	0	1	0	1	1	1	1
M-SI/ND	i9_median	0	0	0	0	0	0	0	0
M-SI/ND	i9_prop0	0.76	0.09	0.75	0.17	0.99	0.53	0.67	0.83
M-SI/ND	i9_rmssd	0.62	0.17	0.63	0.21	1	0.14	0.5	0.71
M-SI/ND	score_8_median	5.35	2.98	6	5	11	0	3	8
M-SI/WD	i9_max	1	0	1	0	1	1	1	1
M-SI/WD	i9_median	0	0	0	0	0	0	0	0
M-SI/WD	i9_prop0	0.75	0.09	0.75	0.17	0.98	0.54	0.67	0.83
M-SI/WD	i9_rmssd	0.64	0.18	0.63	0.21	1	0.19	0.5	0.71
M-SI/WD	score_8_median	14.02	3.1	13.5	4.5	24	8	11.5	16
V-SI	i9_max	2.43	0.5	2	1	3	1	2	3
V-SI	i9_median	0	0	0	0	0	0	0	0
V-SI	i9_prop0	0.73	0.1	0.71	0.13	0.97	0.52	0.67	0.8
V-SI	i9_rmssd	1.38	0.52	1.34	0.69	3	0	1	1.69
V-SI	score_8_median	11.04	5.58	11	8	24	0	7	15
P-SI	i9_max	2.1	0.82	2	2	3	1	1	3
P-SI	i9_median	1.18	0.63	1	0	3	0	1	1
P-SI	i9_prop0	0.28	0.18	0.33	0.26	0.6	0	0.14	0.4
P-SI	i9_rmssd	1.09	0.56	1	0.71	3	0	0.71	1.41
P-SI	score_8_median	14.94	4.58	15	6	24	0	12	18
